# Supplementary material
Source: PubMed Central journal article supplement (PMC4482302)
Supplement: DS_10.1177_1941738115571093.pdf [file DS_10.1177_1941738115571093.pdf]

**Appendix 1. Multivariable Logistic Model of Group Differences**

| <b>Parameter</b>                      | <b>Group*</b>     | <b>Estimate</b>        | <b>Standard Error</b> | <b>Wald Chi-Square</b> | <b>P value</b> |
|---------------------------------------|-------------------|------------------------|-----------------------|------------------------|----------------|
| <b>Intercept</b>                      | <b>Minimalist</b> | 50.4026                | 37.3658               | 1.8195                 | 0.177          |
|                                       | <b>Socketed</b>   | 59.0465                | 33.9140               | 3.0313                 | 0.082          |
| <b>Ground Contact Time</b>            | <b>Minimalist</b> | -0.1213                | 0.0522                | 5.4003                 | 0.020          |
|                                       | <b>Socketed</b>   | -0.1119                | 0.0494                | 5.1262                 | 0.023          |
| <b>Foot Strike – FFS</b>              | <b>Minimalist</b> | 1.4201                 | 1.2889                | 1.2139                 | 0.270          |
|                                       | <b>Socketed</b>   | 1.0725                 | 1.2861                | 0.6954                 | 0.404          |
| <b>Foot Strike – MFS</b>              | <b>Minimalist</b> | -0.2522                | 1.1358                | 0.0493                 | 0.824          |
|                                       | <b>Socketed</b>   | -0.8524                | 1.1622                | 0.5379                 | 0.463          |
| <b>Knee Angle</b>                     | <b>Minimalist</b> | -0.2210                | 0.1645                | 1.8065                 | 0.179          |
|                                       | <b>Socketed</b>   | -0.1725                | 0.1398                | 1.5217                 | 0.217          |
| <b>Stride Cadence</b>                 | <b>Minimalist</b> | 0.1038                 | 0.0775                | 1.7901                 | 0.181          |
|                                       | <b>Socketed</b>   | -0.00869               | 0.0660                | 0.0173                 | 0.895          |
| *Traditional shoes as reference group |                   |                        |                       |                        |                |
| <b>Overall analysis of effects</b>    |                   |                        |                       |                        |                |
| <b>Effect</b>                         | <b>DF</b>         | <b>Wald Chi-Square</b> | <b>P value</b>        |                        |                |
| <b>Ground Contact Time</b>            | <b>2</b>          | 5.8012                 | 0.05                  |                        |                |
| <b>Foot Strike</b>                    | <b>4</b>          | 3.3470                 | 0.50                  |                        |                |
| <b>Knee Angle</b>                     | <b>2</b>          | 2.1103                 | 0.35                  |                        |                |
| <b>Stride Cadence</b>                 | <b>2</b>          | 3.2753                 | 0.19                  |                        |                |
